# Supplementary material for: Solar radiation stimulates release of semi-labile dissolved organic matter from microplastics
Source: Frontiers journal article supplement (doi:10.3389/fmars.2023.1284280), 2023-12-19
Supplement: Data_Sheet_1.docx [file Data_Sheet_1.docx]

***Supplementary information for***

**Solar radiation stimulates release of semi-labile dissolved organic matter from microplastics**

Jun Wang a,†,* and Ruanhong Caib,† *

a Department of marine biology, Xiamen Ocean Vocational College, Xiamen, China, 361102

b College of Ocean and Earth Sciences, Xiamen University, Xiamen 361005, China

† These authors contribute equally to this work

* Correspondence to Jun Wang (Email: [wangjun@xmoc.edu.cn](mailto:wangjun@xmoc.edu.cn)) or Ruanhong Cai (Email: crh1987@163.com)


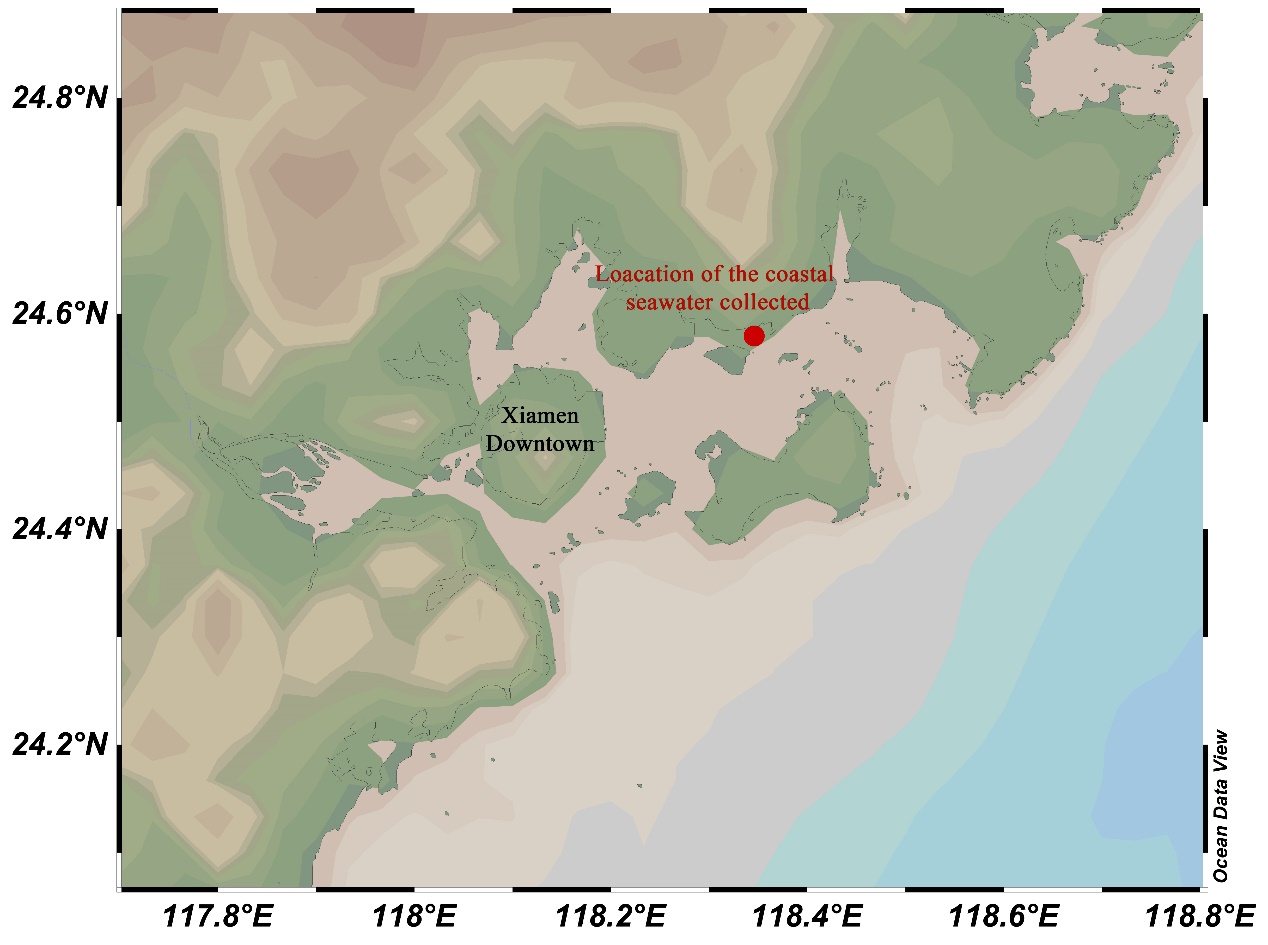


**Figure S1. Location of natural coastal seawater sample collected for the 30 days’ incubation.** Surface water sample was collected from a station (24°5793’N, 118°3459’E) off the Xiamen coast in September 2022. This water sample was used for DOM extraction and molecular analysis, and a bioavailability incubation.


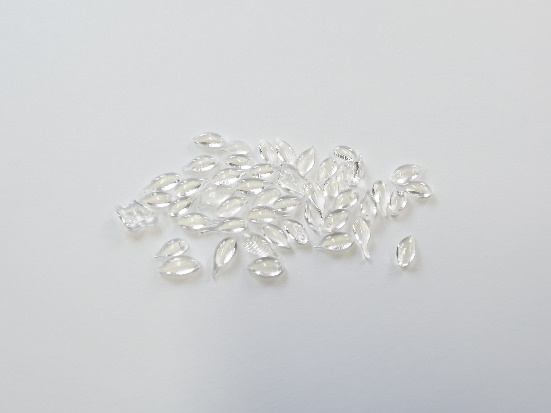

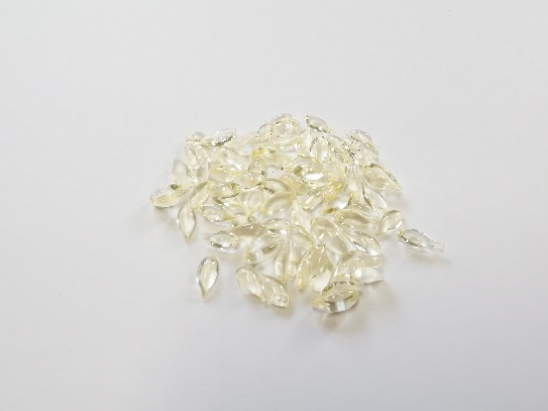


**Figure S2. The appearance of polystyrene (PS) before (left panel) and after (right panel) the ten days’ solar radiation incubation experiment in artificial seawater.** The commercial PS pellets were apparently transparent while they turned lemon-yellow after the solar incubation experiment.


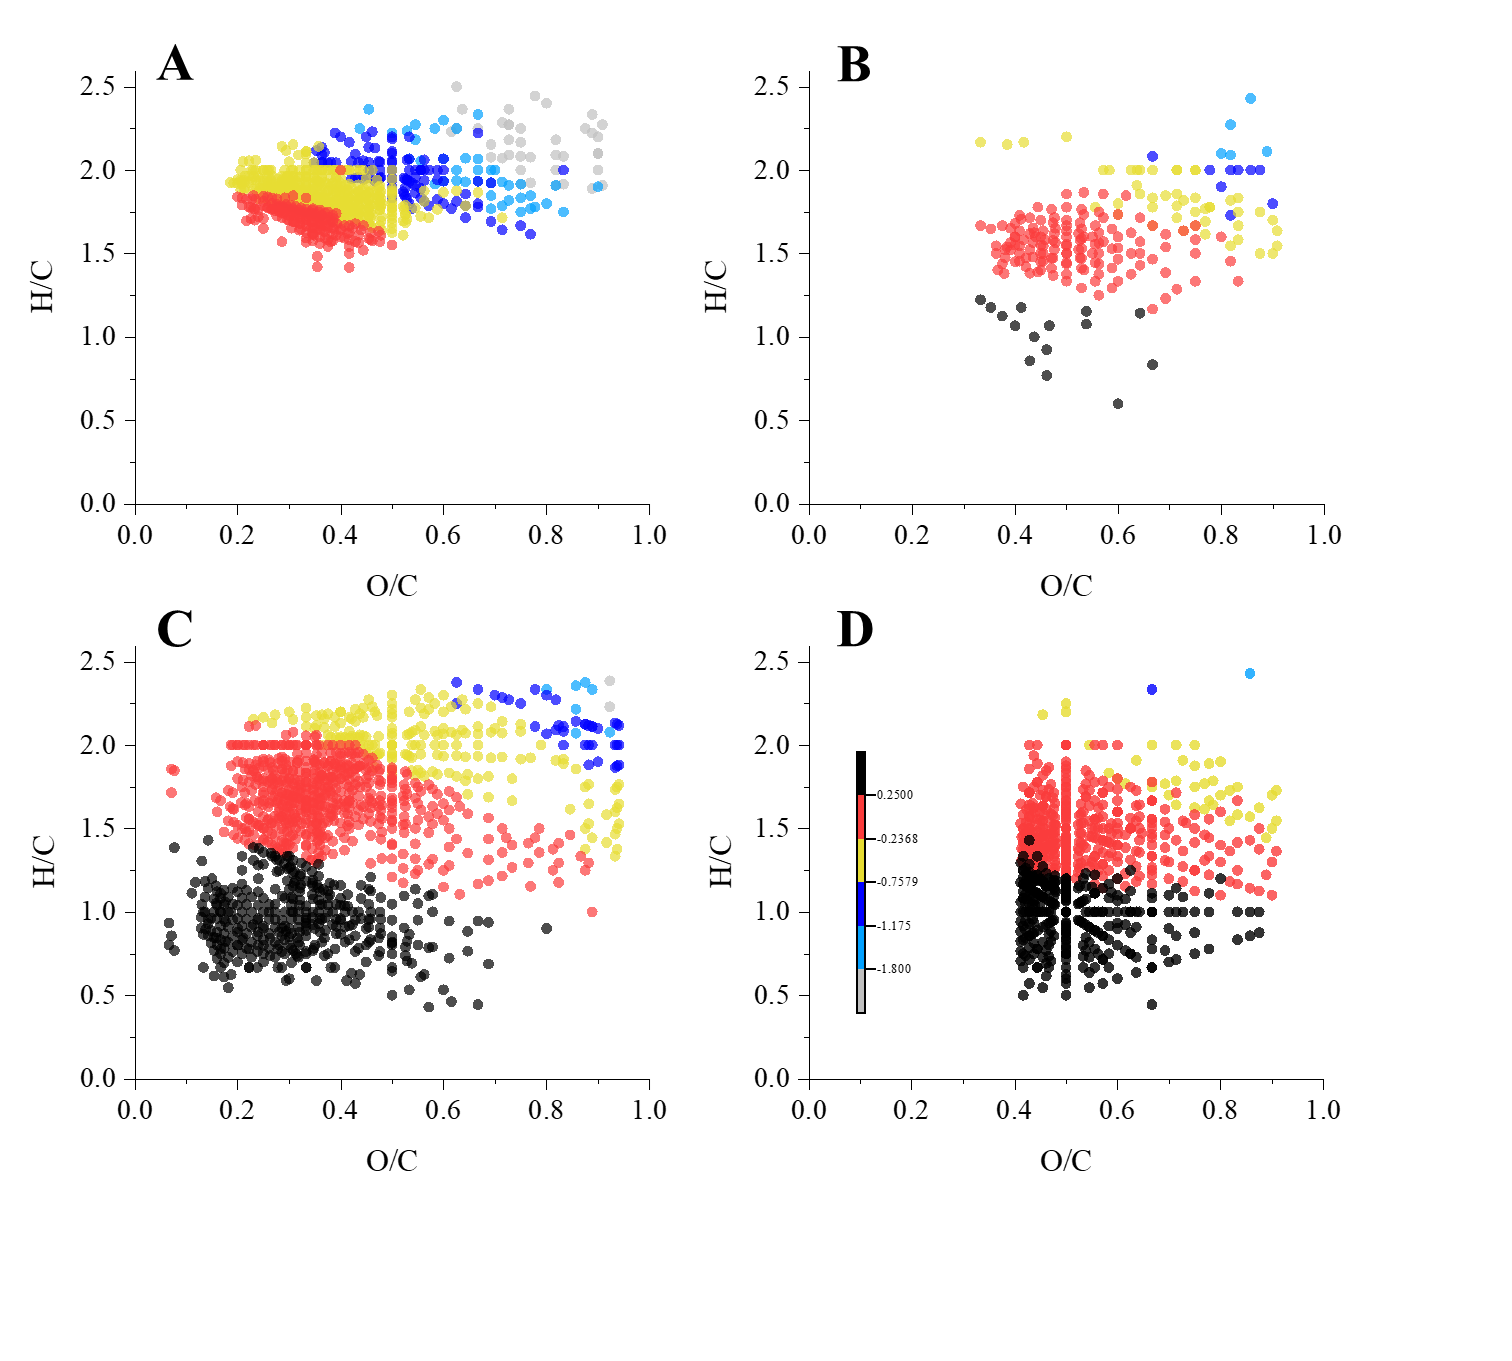


**Figure S3. van Krevelen diagrams showing the unique DOM molecules in LDPE-DOM compared to the Coastal-DOM (A), the common molecules existed in LDPE-DOM and Coastal-DOM (B), the unique DOM molecules in PS-DOM compared to the Coastal-DOM (C), the common molecules existed in PS-DOM and Coastal-DOM (D).** The color bar represents the modified aromatic index (AImod) of each formula in the DOM samples.

**Figure S4. Total dissolved nitrogen concentration variations in the LDPE-light and PS-light incubations after 10-day solar exposure.** The total dissolved nitrogen concentration was analyzed by the Shimadzu TOC-LCPH Total Organic Carbon analyzer coupled with a total dissolved nitrogen analyzing unit.

**Figure S5. Temporal variations in bacterial abundance in the controls and LDPE- and PS-DOM amended treatments of the coastal seawaters during the 30-day period.** The experiment was conducted in duplicate.

**Table S1**. Formula counts and averages of the oxygen to carbon ratios (O/Ca), hydrogen to carbon ratios (H/Ca), double-bound equivalent (DBEa), and modified aromatic index (AImoda) were calculated from the assigned formulas of each sample (LDPE-DOM, PS-DOM, and Coastal-DOM) measured by the ultrahigh resolution mass spectrometry.

| Sample | Formula counts | O/Ca | H/Ca | DBEa | AImoda |
| --- | --- | --- | --- | --- | --- |
| LDPE-DOM | 1019 | 0.474 | 1.796 | 3.695 | 0.019 |
| PS-DOM | 2694 | 0.415 | 1.403 | 6.805 | 0.223 |
| Coastal-DOM | 3775 | 0.442 | 1.326 | 7.079 | 0.289 |
